# Supplementary material
Source: PubMed Central journal article supplement (PMC4111258)

**Fig. S1 Malvern particle size raw data scans of QD in (a) water, (b) 75% glycerol at 2 hr and (c) 75% glycerol at 24 hr stored at room temperature.**

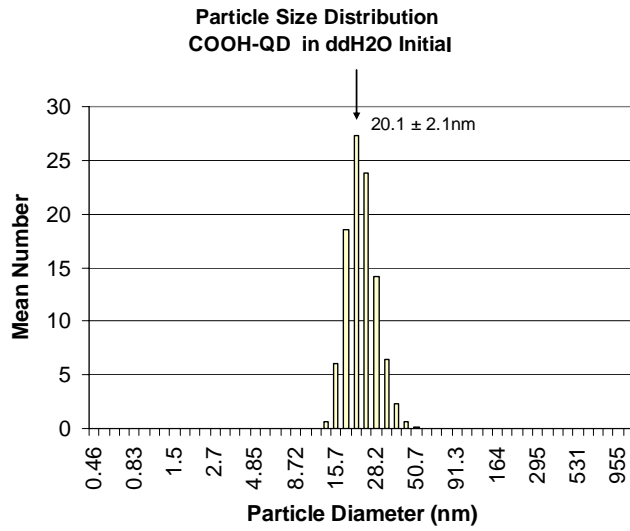

a.

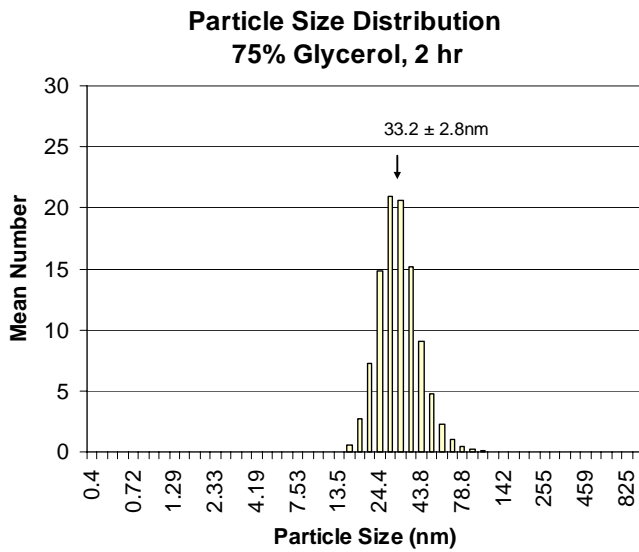

b.

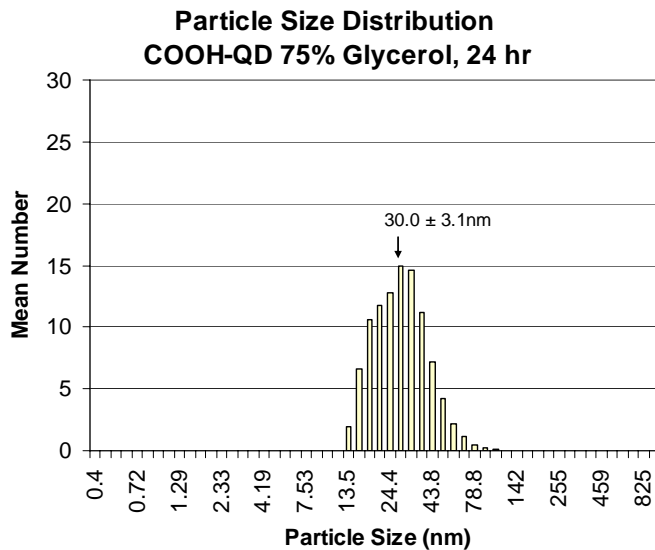

c.

**Fig. S2 Epidermal thickness data post UVR exposure (8 and 24 hr) relative to control (no UVR).**

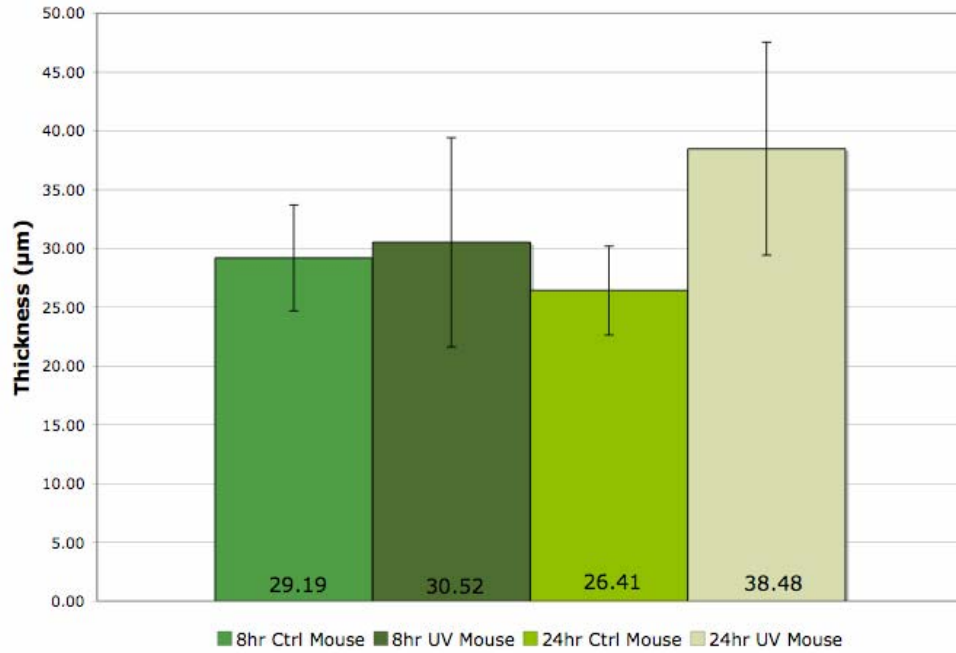

**Fig. S3 Bright field image of thickened skin at 4.5 days post-UV**

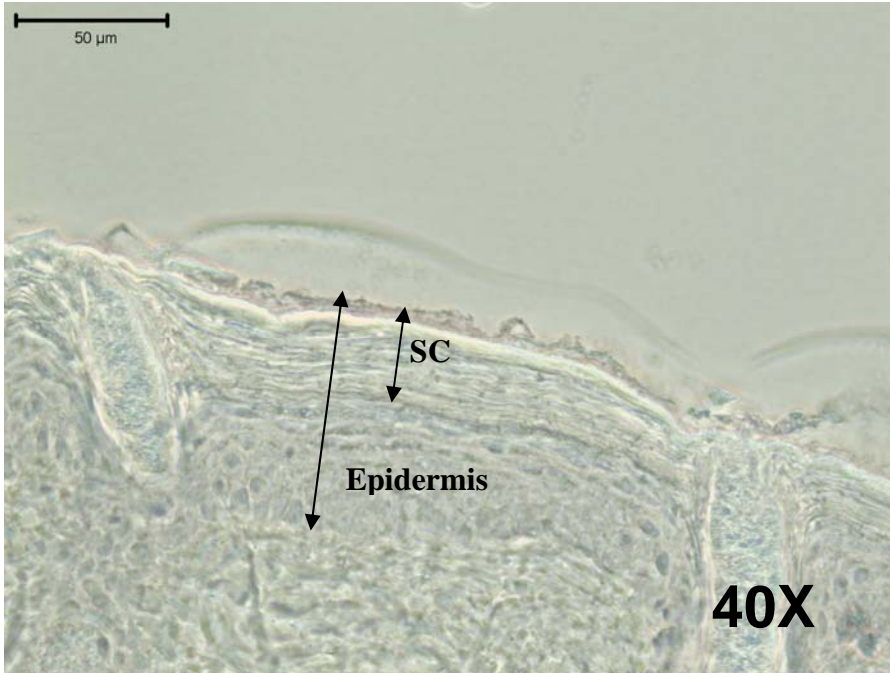

**Fig. S4 Cyrohistology section for 8hr ctrl (no UVR) in bright field (left) with corresponding fluorescence image (right) showing QD collection in stratum corneum defects (arrows) . Dapi – blue cell nuclei stain. Red is Loricrin a SC protein.**

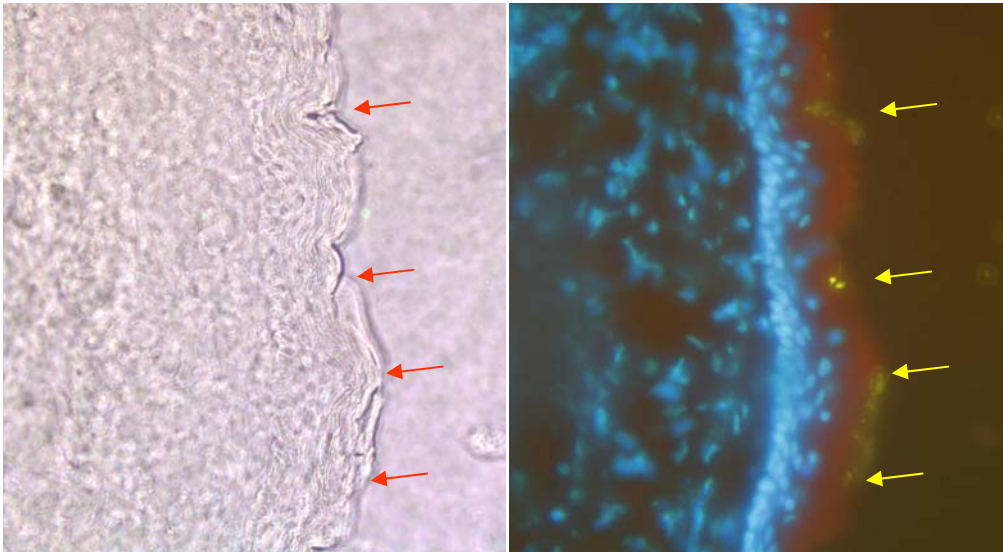

**Fig. S5 Particle size as measured on TEM**

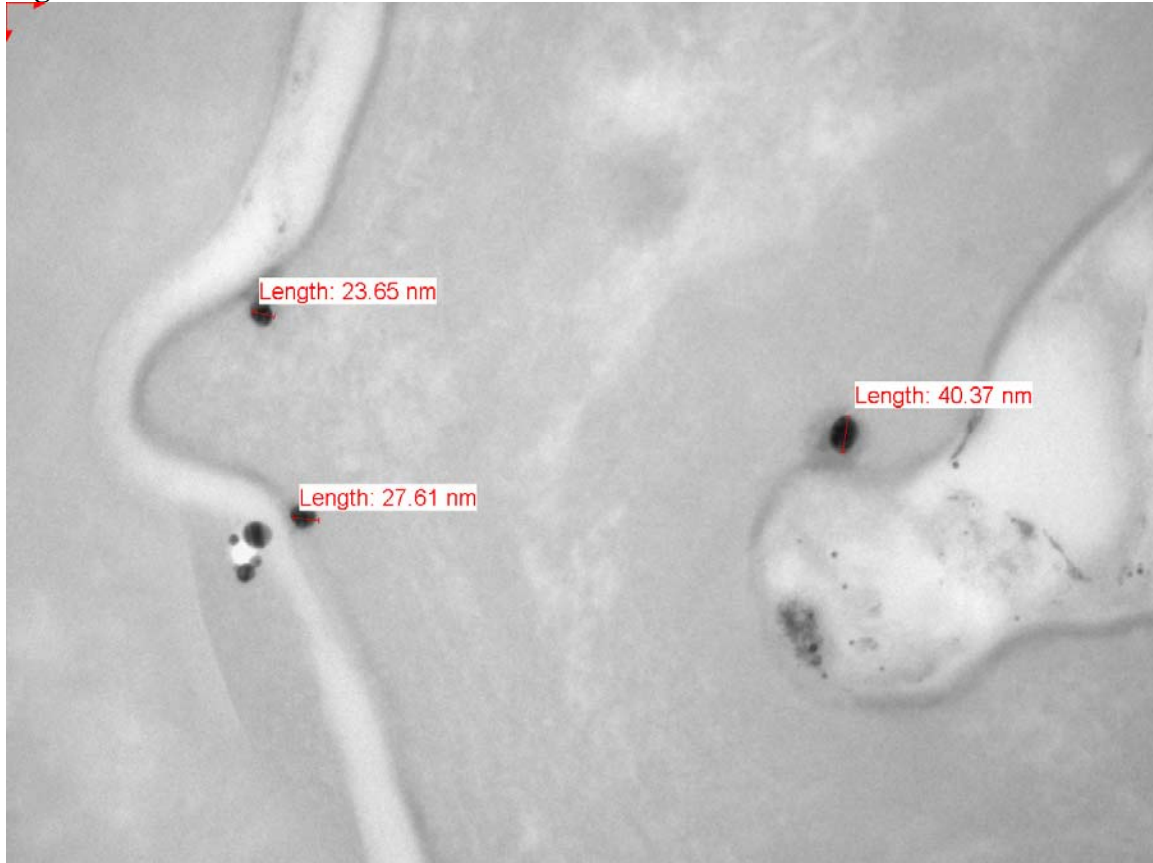

**Fig. S6 TEM image of negative control (no QD, glycerol only) and corresponding EDAX spectral scan of dark deposits showing no evidence of silver deposition.**

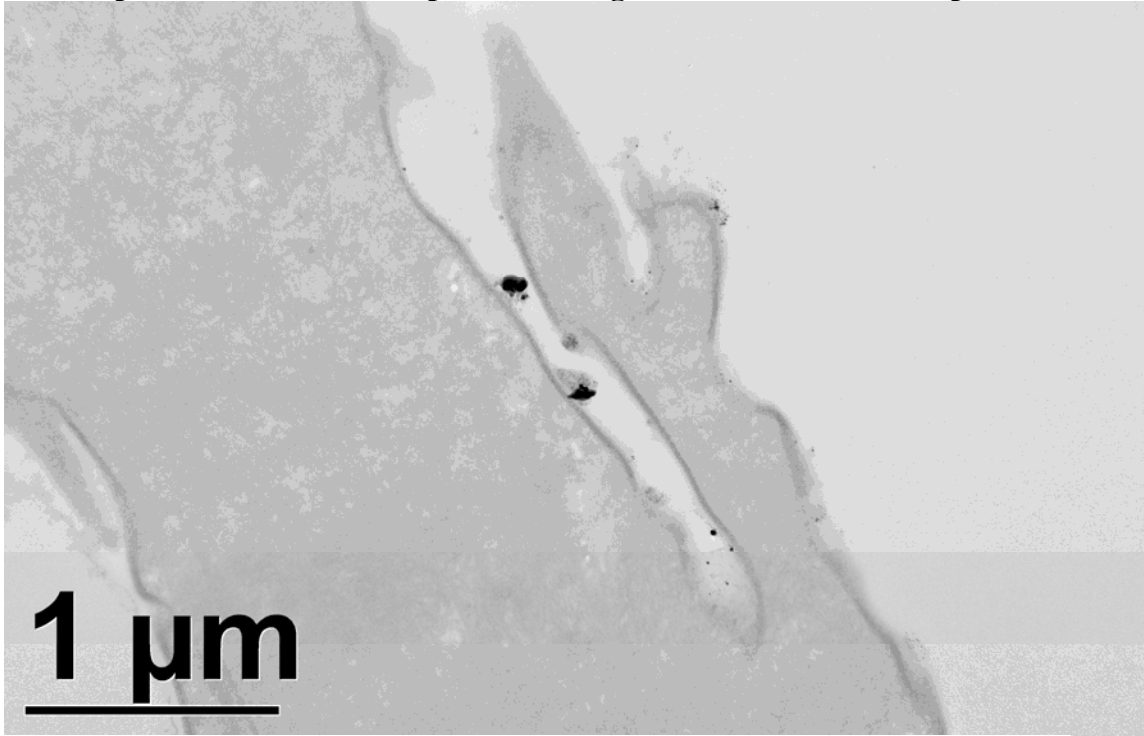

C:\Spectra\DeLouise\_071024-MouseSkin-{}ctrl-Ag-0002.spc

Label A:

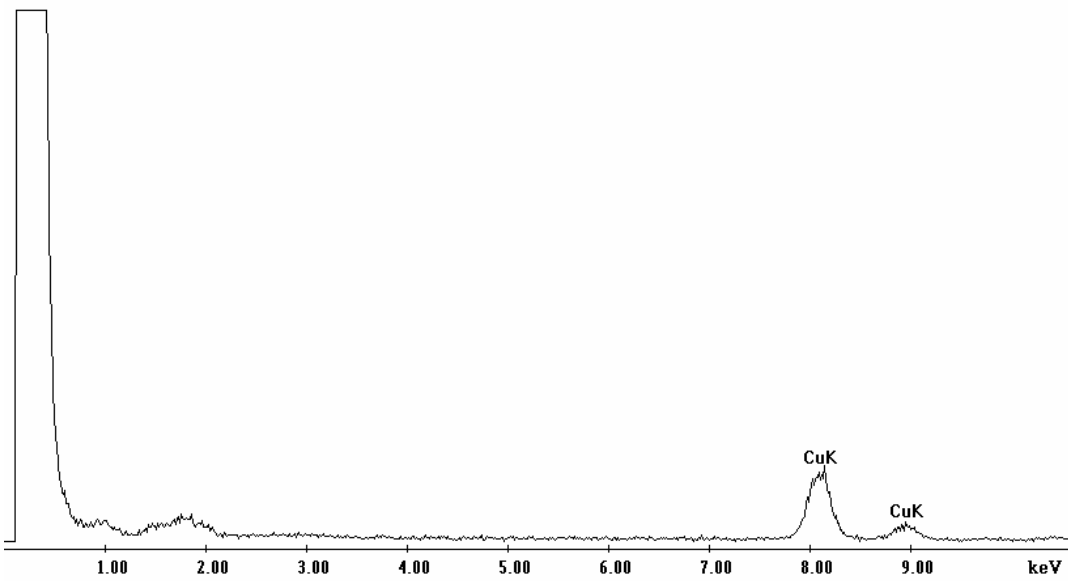

Supplement: NIHMS592937-supplement-supp_data.pdf [file NIHMS592937-supplement-supp_data.pdf]
